# Supplementary material for: Serological surveys to estimate cumulative incidence of SARS-CoV-2 infection in adults (Sero-MAss study), Massachusetts, July-August 2020: a mail-based cross-sectional study
Source: bioRxiv or medRxiv preprint supplement (doi:10.1101/2021.03.05.21249174), 2021-05-06

## **Supplemental Information**

**Supplemental Table 1: Comparison of characteristics of participants selected for randomization and those not selected for randomization, SARS-CoV-2 serosurvey, Massachusetts, USA, Jul-Aug 2020.**

|                                            | <b>Primary Sampling Group (undergraduates)</b> |              | <b>Secondary sampling group (employees)</b> |               |
|--------------------------------------------|------------------------------------------------|--------------|---------------------------------------------|---------------|
|                                            | Not Randomized                                 | Randomized   | Not Randomized                              | Randomized    |
| n                                          | 869                                            | 752          | 2253                                        | 249           |
| Age (mean (SD))                            | 20.64 (3.09)                                   | 20.18 (1.79) | 42.05 (13.53)                               | 40.69 (13.88) |
| Gender (%)                                 |                                                |              |                                             |               |
| Unknown                                    | 0 (0.0)                                        | 0 (0.0)      | 1 (0.0)                                     | 0 (0.0)       |
| Female                                     | 525 (60.4)                                     | 453 (60.2)   | 1262 (56.0)                                 | 147 (59.0)    |
| Gender diverse                             | 12 (1.4)                                       | 8 (1.1)      | 49 (2.2)                                    | 3 (1.2)       |
| Male                                       | 332 (38.2)                                     | 291 (38.7)   | 941 (41.8)                                  | 99 (39.8)     |
| Febrile Illness during February (%)        |                                                |              |                                             |               |
| Unknown                                    | 1 (0.1)                                        | 2 (0.3)      | 6 (0.3)                                     | 0 (0.0)       |
| No                                         | 568 (65.4)                                     | 499 (66.4)   | 1658 (73.6)                                 | 189 (75.9)    |
| Not sure                                   | 75 (8.6)                                       | 57 (7.6)     | 154 (6.8)                                   | 16 (6.4)      |
| Yes                                        | 225 (25.9)                                     | 194 (25.8)   | 435 (19.3)                                  | 44 (17.7)     |
| Education (%)                              |                                                |              |                                             |               |
| Unknown                                    | 4 (0.5)                                        | 3 (0.4)      | 6 (0.3)                                     | 1 (0.4)       |
| BA/BS                                      | 15 (1.7)                                       | 14 (1.9)     | 509 (22.6)                                  | 64 (25.7)     |
| High school / GED                          | 90 (10.4)                                      | 108 (14.4)   | 46 (2.0)                                    | 2 (0.8)       |
| More than BA/BS                            | 2 (0.2)                                        | 0 (0.0)      | 1528 (67.8)                                 | 166 (66.7)    |
| Prefer not to answer                       | 1 (0.1)                                        | 0 (0.0)      | 13 (0.6)                                    | 1 (0.4)       |
| Some college                               | 757 (87.1)                                     | 627 (83.4)   | 151 (6.7)                                   | 15 (6.0)      |
| Response to, "I am afraid of COVID-19" (%) |                                                |              |                                             |               |
| Unknown                                    | 1 (0.1)                                        | 2 (0.3)      | 2 (0.1)                                     | 0 (0.0)       |
| Neither agree nor disagree                 | 199 (22.9)                                     | 141 (18.8)   | 399 (17.7)                                  | 51 (20.5)     |
| Somewhat agree                             | 390 (44.9)                                     | 374 (49.7)   | 1051 (46.6)                                 | 100 (40.2)    |
| Somewhat disagree                          | 115 (13.2)                                     | 99 (13.2)    | 153 (6.8)                                   | 22 (8.8)      |
| Strongly agree                             | 121 (13.9)                                     | 104 (13.8)   | 573 (25.4)                                  | 66 (26.5)     |
| Strongly disagree                          | 43 (4.9)                                       | 32 (4.3)     | 75 (3.3)                                    | 10 (4.0)      |

S-Fig 1. Distributions of IgG log normal optical densities (OD) ratios, by subgroups, SARS-CoV-2, Massachusetts, USA, Jul-Aug 2020.

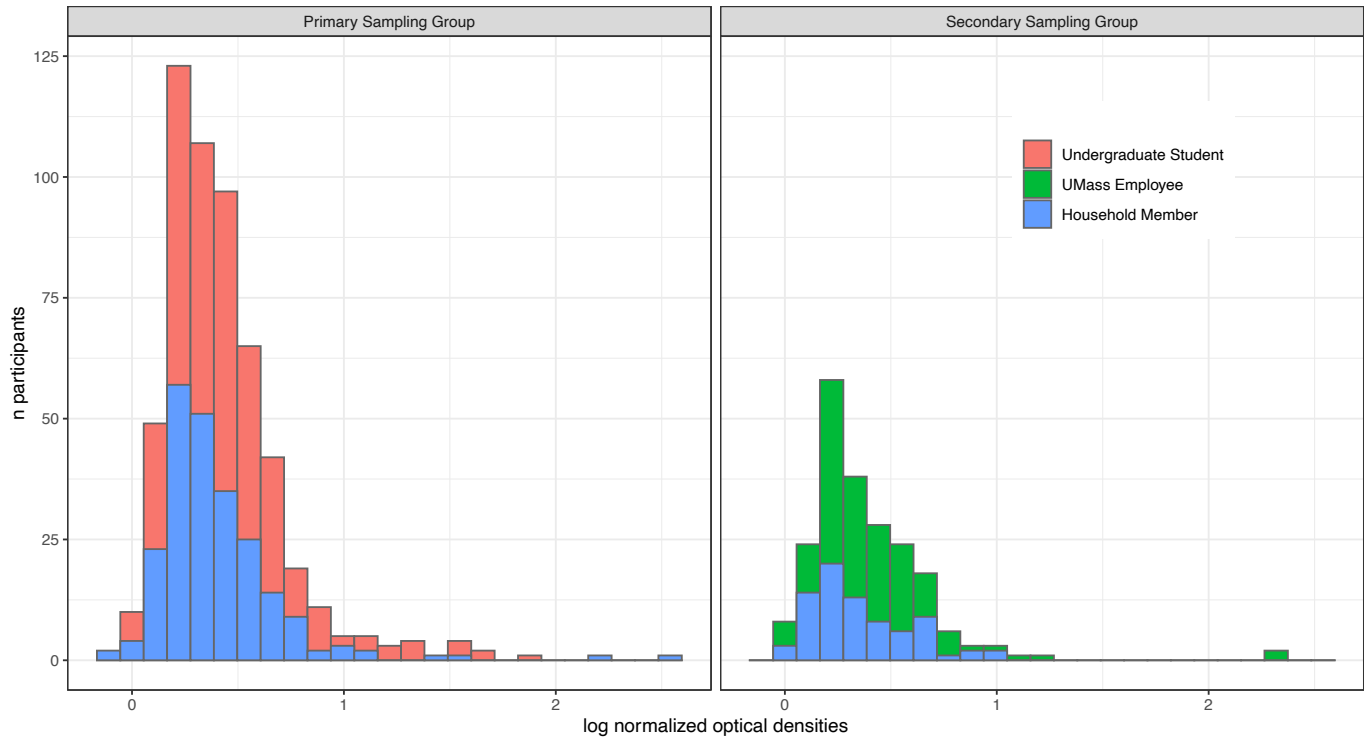

Supplement: Supplementary file [file media-1.pdf]
